# Supplementary material
Source: PubMed Central journal article supplement (PMC3268310)
Supplement: 1109683109_pnas.201109683SI.pdf [file 1109683109_pnas.201109683SI.pdf]

# Supporting Information

Paik et al. 10.1073/pnas.1109683109

## SI Methods

**Plant Material and Growth Condition.** *Arabidopsis thaliana* plants were grown in a growth room with a 16-h light/8-h dark cycle at 22–24 °C for phenotypic analysis and seed harvest.

For the generation of *PNT1* overexpression lines, full-length *PNT1* coding sequence with (*PNT1-OX1*) or without (*PNT1-GFP*) a stop codon was amplified with specific primer sets (Table S1) and cloned into binary vectors. Two independent homozygous lines that express transgenes were established for each construct. The *pnt1-1* allele was isolated from GABI\_676A09, which has a T-DNA insertion at the sixth exon (GATTCATTA-(T-DNA)-CTTCTCATTG) and the *pnt1-2* allele was isolated from T-DNA insertions lines on Ws-2 background, which has a T-DNA at the fourth intron (GATTCATTA-(T-DNA)-CTTCTCATTG). For *PHYB-myc* lines, the full-length *PHYB* was amplified with a specific primer set and cloned into pHTM, which expresses a protein tagged with 9 myc epitopes (1). PIF3-myc and GFP-myc were described previously (1, 2). Other mutants used in this work are *phyA-211*, *phyB-9*, *phyA-211/phyB-9* double mutant, and *fhy1/fhl* double mutant, all of which are Col-0 background. For transgenic *Arabidopsis* harboring luciferase reporter gene, a firefly luciferase gene or a firefly luciferase gene with 5'-UTR (and 3'-UTR of *PORA* gene were introduced to wild type (Col-0) or mutants (*pnt1-1*, *phyA-211*, *fhy1/fhl*) and homozygous transgenic lines were selected and used for the assay.

**Luciferase Reporter Assay.** Protoplast transient reporter assay was performed as described previously (3). Leaf number 7–9 of 3.5–4 wk old plants were used as material. 3 µg of UTR containing luciferase reporters were transfected with 0.3 µg of Renilla luciferase. After PEG transfection samples were irradiated with far-red light for 30 mins and incubated 15 h in the dark, red and far-red at 22 °C. For the luciferase reporter assay using transgenic plants, 40 seeds were grown on 1/2 MS agar plates without sucrose for 3 d under various light conditions before sampling. Sample seedlings were ground in the liquid nitrogen and total proteins were solubilized in 50 µL of PLB (supplied in Promega's

dual luciferase assay kit) supplemented with 1× complete mini protease inhibitor mixture (Roche). The luciferase activities were measured by dual-luciferase assay kit (Promega).

**Photobleaching Assay.** For FR-block of greening assay, 50 seeds were surface sterilized and plated on 1/2 MS agar media without sucrose. Germination was synchronized by 4 d of cold treatment followed by 6 h of white light treatment. After indicated days of far-red light (2.4 µmol/m<sup>2</sup>/s) treatments or in the dark, the plates were transferred to white light for 4 d. The degree of photobleaching was determined either by measuring chlorophyll levels by spectrophotometer or by counting number of seedlings with green cotyledons. For gibberellins (GA) treatment, 50 seeds were plated and grown 1 d on the 3M filter paper on 1/2 MS agar media in far-red light, and germinating seedlings on the filter paper were transferred to the same media containing 5 µM GA<sub>4+7</sub>.

**Protein and mRNA Analysis.** A total of 50 seedlings were grown in the red and far-red light for 4 d. Collected seedlings were ground in liquid nitrogen and total proteins were solubilized by protein extraction buffer (100 mM NaH<sub>2</sub>PO<sub>4</sub>, 10 mM Tris-Cl pH 7.5, 8 M urea, 1× complete mini protease inhibitor). Cell debris were precipitated by centrifugation for 10 min in 4 °C and supernatant was boiled with SDS sample buffer. The same amount of total proteins were separated by 10–17% SDS/PAGE gel. Anti-POR antibody (Agrisera) and anti-α-tubulin antibody (Sigma) were used for the blotting. Total RNAs were isolated with plant total RNA kit (Sigma) according to the manufacturer's instruction. A total of 2 µg of total RNAs were reverse transcribed and real-time PCR was performed to quantify the levels of each gene with specific primers.

**Yeast Two-Hybrid Screening.** A C-terminal domain of *Arabidopsis* phyA (514–1122 aa) cloned in pGBT9 vector was used to screen interacting proteins from 7-d-old, light-grown seedling cDNA library cloned in pGAD424 vector (Clontech).

1. Park E, et al. (2004) Degradation of phytochrome interacting factor 3 in phytochrome-mediated light signaling. *Plant Cell Physiol* 45:968–975.  
2. Shin J, Park E, Choi G (2007) PIF3 regulates anthocyanin biosynthesis in an H5-dependent manner with both factors directly binding anthocyanin biosynthetic gene promoters in *Arabidopsis*. *Plant J* 49:981–994.

3. Yoo SD, Cho YH, Sheen J (2007) *Arabidopsis* mesophyll protoplasts: A versatile cell system for transient gene expression analysis. *Nat Protoc* 2:1565–1572.

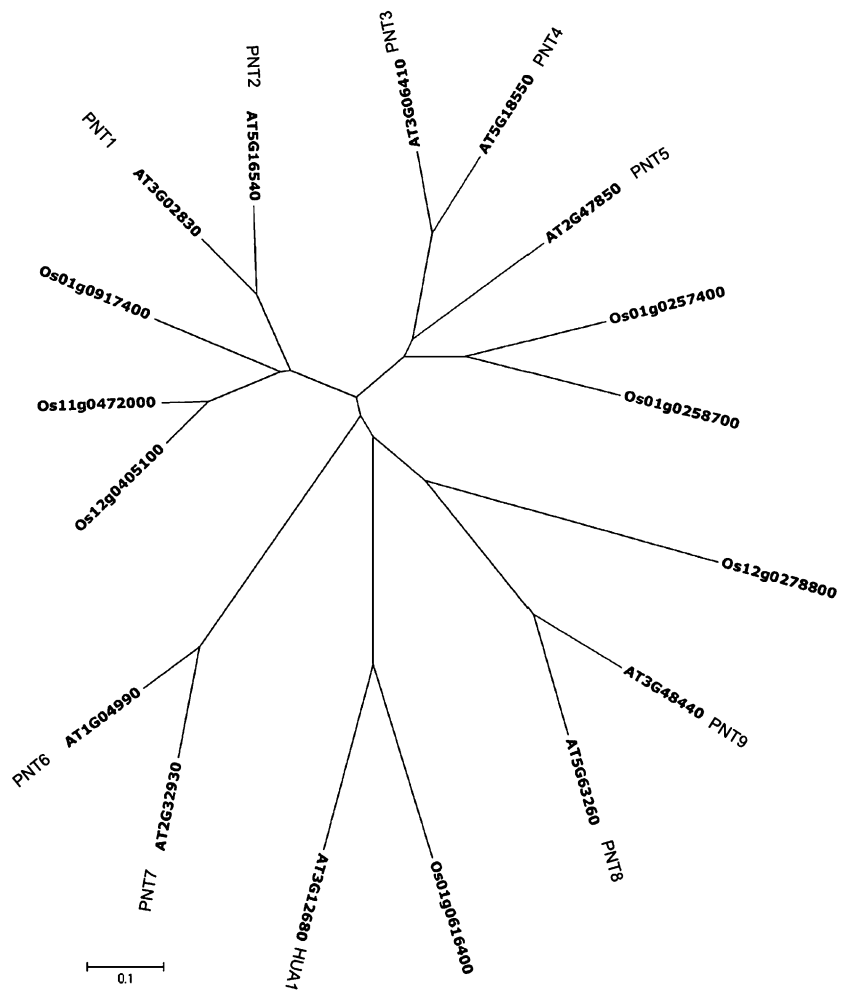

Fig. S1. A neighbor joining tree showing the relationships between PNT1 family members of *Arabidopsis* and rice. The tree was drawn by the MEGA4 program.

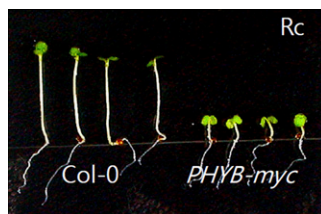

Fig. S2. Hypocotyl elongation of *PHYB-myc* transgenic *Arabidopsis* under red light condition.

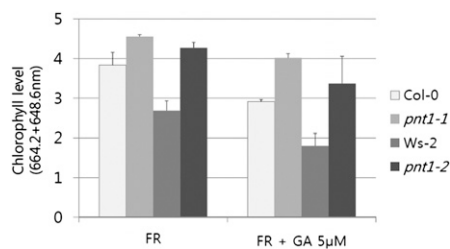

Fig. S3. Quantification of chlorophyll after transferring FR-grown seedlings to white light in the presence of gibberellins ( $GA_{4+7}$ ). For GA treatment, 1 d-old FR-grown seedlings were transferred to 5  $\mu M$   $GA_{4+7}$  and they grew 4 more days under far-red light (2.4  $\mu mol/m^2/s$ ) before transfer to white light (100  $\mu mol/m^2/s$ ) (SD,  $n = 3$ ).

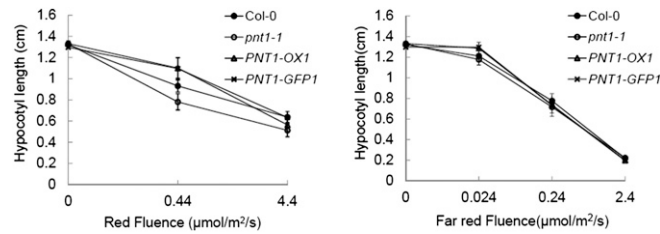

**Fig. S4.** PNT1 does not play a major role in light-dependent hypocotyl elongation. Seeds were imbibed 3 d at 4 °C in the dark, irradiated with white light for 6 h for the induction of germination, and grown for 4 d under various fluence rates of red and far-red light. Thirty seedlings were randomly chosen for the measurement for each fluence rate (SD,  $n = 30$ ).

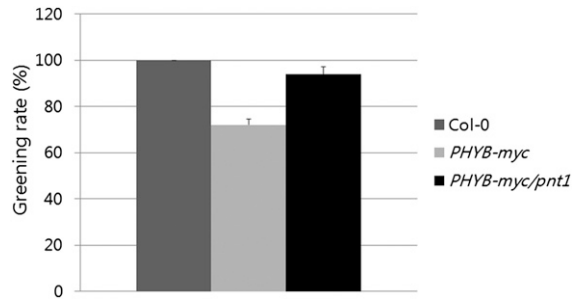

**Fig. S5.** Greening rate of etiolated *PHYB-myc* and *PHYB-myc/pnt1-1* lines. Five day-old etiolated seedlings were transferred to white light for 2 d and seedlings with green cotyledons were counted (SD,  $n = 3$ ).

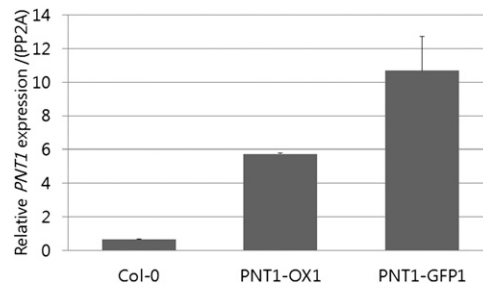

**Fig. S6.** Expression level of *PNT1* mRNA in two *PNT1* overexpression lines (*PNT1-OX1* and *PNT1-GFP*).

**Table S1. Primer sequences used in this study**

| Primer name             | Primer sequence                     |
|-------------------------|-------------------------------------|
| PNT1 LP                 | GATCCCTAGG ATGGATTTTA ATGCCGGAGT TC |
| PNT1 RP1 (PNT1-GFP)     | CCGAAGATCTCCACCCTGCTGTGTATTATCAATG  |
| PNT1 RP2 (PNT1-OX1)     | CCGAAGATCTTCACTGCTGTGTATTATCAATG    |
| PNT1 real time LP       | GGATGGAACC CTTACAGTGG TCAGC         |
| PNT1 real time RP       | TCCCGGATTG TAACCCGAGA ATGAT         |
| HEMA real time LP       | AGCGGTTGATGACTTAAGCCGAGGT           |
| HEMA real time RP       | GGGTCTCGCTCAGCGTTCTACTGT            |
| GUN5 real time LP       | GAGCTTGATGGAGCGATGGAGCCAATCGTTTTTC  |
| GUN5 real time RP       | GTCCCTACATTACCTTTATCAGGTGGGAAACTG   |
| PORA real time LP       | TTA CCC CGG TTG TAT TGC AAC GAC T   |
| PORA real time RP       | GAG CCT TCT CGA CAT CGC TAG CTT     |
| HPTII real time LP      | CGGTGTCGTC CATCACAGTT TGCCAGT       |
| HPTII real time RP      | CTTGACATTGGGGAGTTTAGCGAGAGC         |
| PP2A real time LP       | TATCGGATGACGATTCTTCGTGCAG           |
| PP2A real time RP       | GCTTGTCGACTATCGGAATGAGAG            |
| Luciferase real time LP | GAATTGGAAT CCATCTTGCT CCAACAC       |
| Luciferase real time RP | GACGTAATCC ACGATCTCTT TTTCCG        |
| phyB LP (phyB-myc)      | AGAGGGATCCAAAATGGTTTCCGGAGTCGGGGGT  |
| phyB RP (phyB-myc)      | AGAGGGATCCCATATGGCATCATCAGCATCAT    |

LP, left primer; RP, right primer.
